# Supplementary material for: Relationship Between Noninvasive Assessment of Lung Fluid Volume and Invasively Measured Cardiac Hemodynamics
Source: PubMed Central journal article supplement (PMC6404458; doi:10.1161/jaha.118.009175), 2018-11-14
Supplement: JAH3-7-e009175-s001.pdf [file JAH3-7-e009175-s001.pdf]

# **SUPPLEMENTAL MATERIAL**

**Table S1. Predictability of ReDS for PAWP >15 mmHg at a cutoff of 35.**

---

|                                     |       |
|-------------------------------------|-------|
| <b>Sensitivity, %</b>               | 75.0% |
| <b>Specificity, %</b>               | 77.1% |
| <b>Positive predictive value, %</b> | 68.9% |
| <b>Negative predictive value, %</b> | 82.1% |

---

**Figure S1. Relationships between ReDS and PAWP (a) and between ReDS and CVP (b) (variables are standardized per standard deviation).**

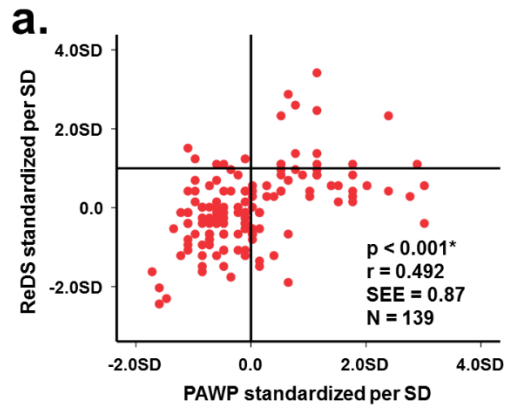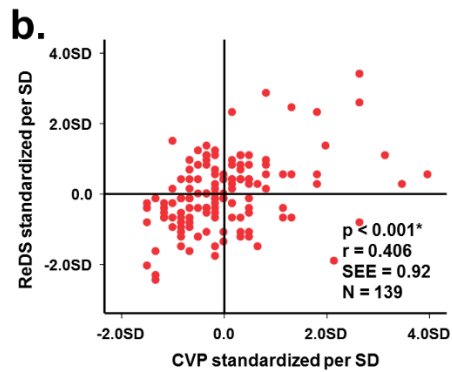

$p < 0.001^*$  by Pearson's correlation coefficient.

ReDS, Remote Dielectric Sensing; PAWP, pulmonary artery wedge pressure; CVP, central venous pressure; SEE, standard error of estimate; SD standard deviation; SD, standard deviation.

**Figure S2. Changes in PAWP and changes in ReDS between the first tests and the second tests.**

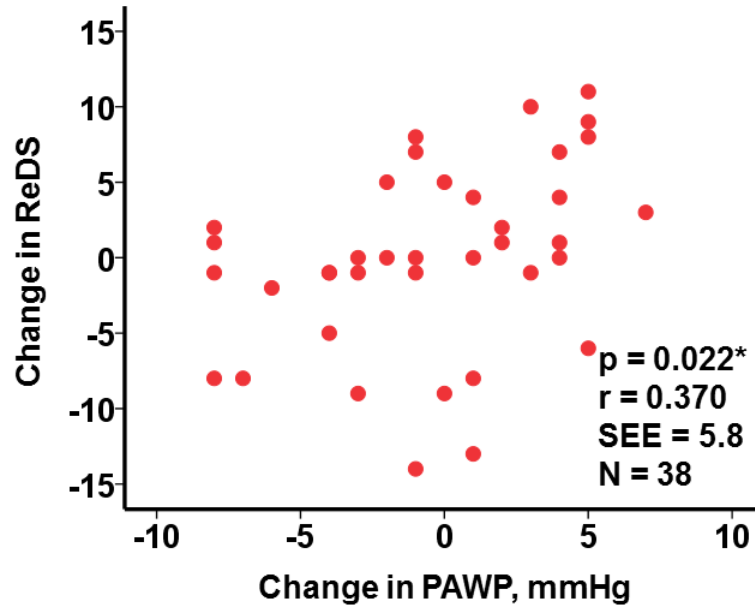

P <0.05\* by Pearson's correlation coefficient.

PAWP, pulmonary artery wedge pressure; ReDS, Remote Dielectric Sensing; SEE, standard error of estimate.

**Figure S3. Trend of ReDS and PAWP between the first and second measurements in 7 patients with ReDS >35 and PAWP  $\geq$ 18 mmHg at the first measurement.**

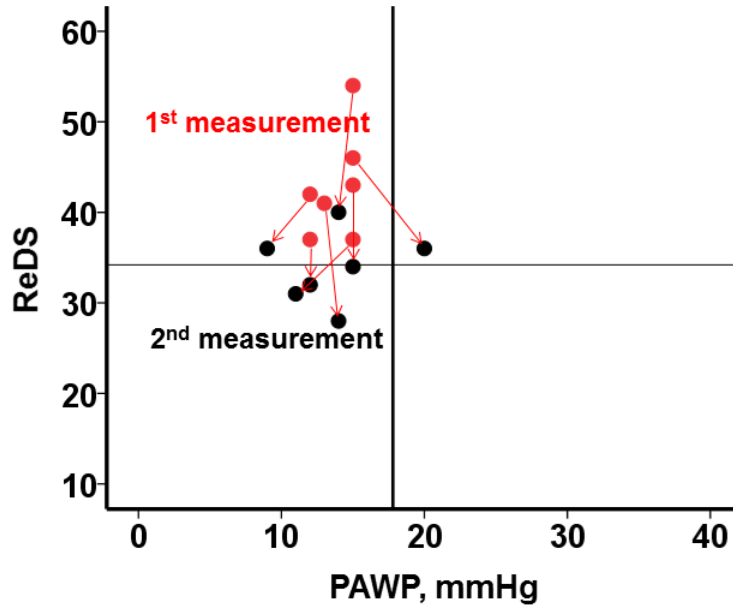

ReDS, Remote Dielectric Sensing; PAWP, pulmonary artery wedge pressure.

## **Supplemental Video Legend**

**Video S1. Explanation of how to measure ReDS.** ReDS, Remote Dielectric Sensing.
